# Supplementary material
Source: PubMed Central journal article supplement (PMC3043500)
Supplement: supp_49_2_707__1.pdf [file supp_49_2_707__1.pdf]

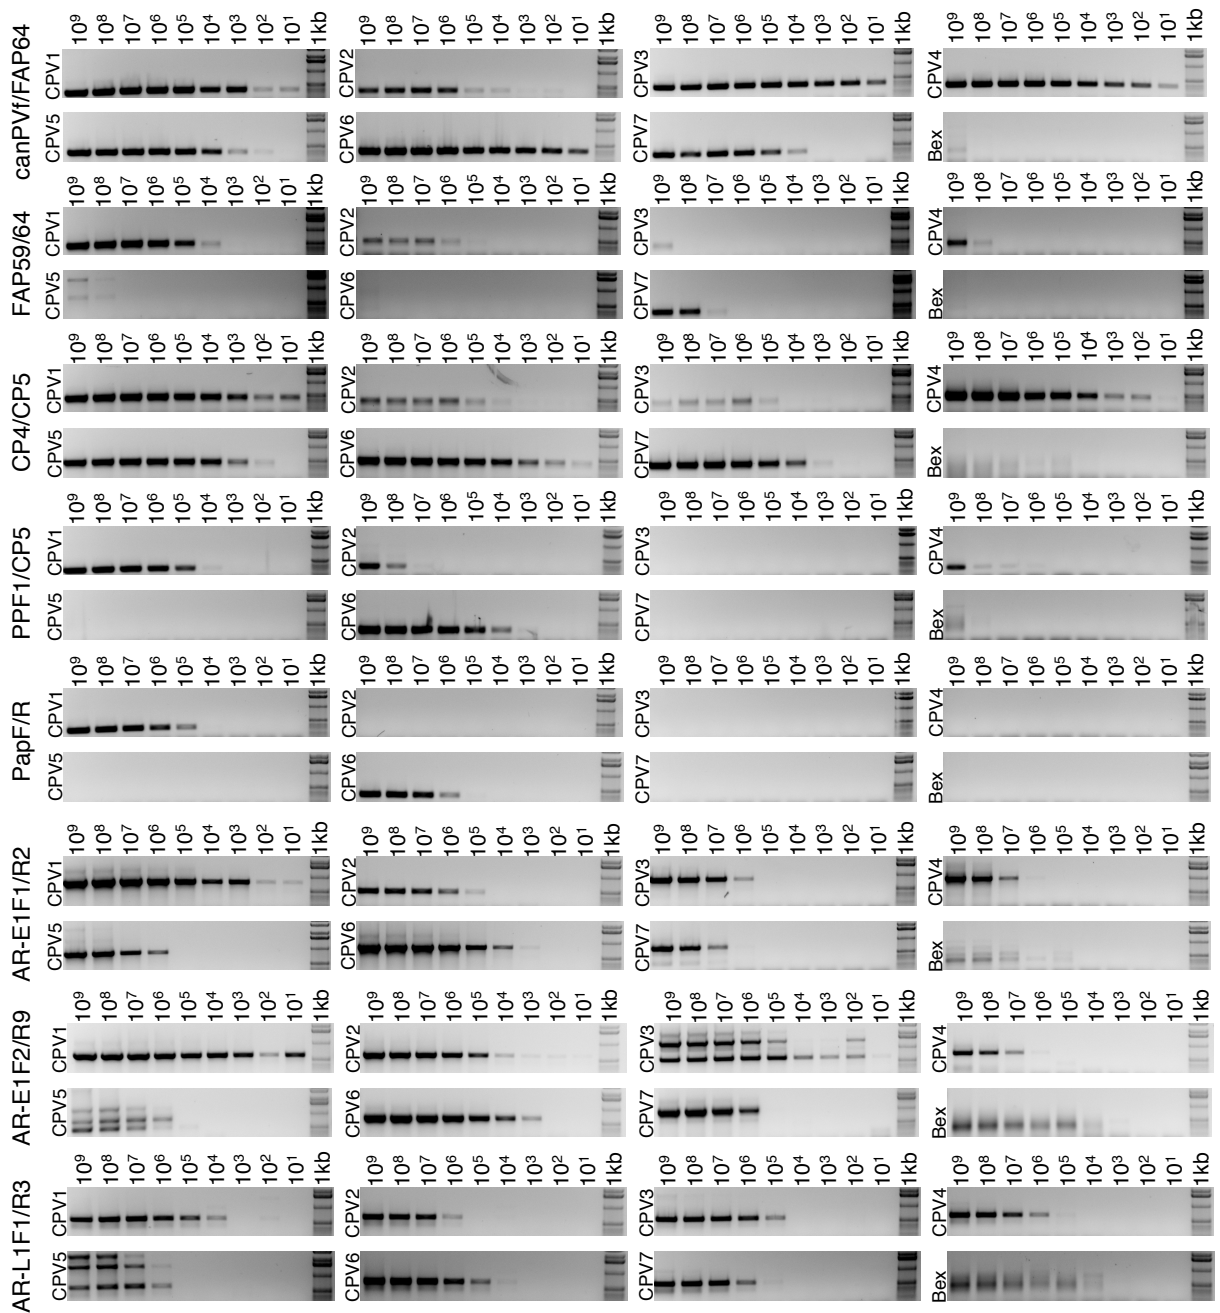

**Figure S1:** Evaluation of PV primers. PCR with eight primer combinations tested on template DNA of seven CPVs and a canine keratinocyte cell culture (Bex). CPV template indicated as molecules per sample, in case of Bex 1:10 serial dilutions of a  $10^6$  cell equivalent.
