# Supplementary material
Source: PubMed Central journal article supplement (PMC3043500)
Supplement: supp_49_2_707__2.pdf [file supp_49_2_707__2.pdf]

Figure S2

Lange *et al.*

|                         |                         |                         |                              |                         |                             |
|-------------------------|-------------------------|-------------------------|------------------------------|-------------------------|-----------------------------|
| <b>FAP59</b>            | TAACWGTNGGNCAACCWTATT   | <b>PPF1</b>             | AACAATGTGTAGACATTATAAACGAGC  | <b>AR-E1F2</b>          | ATGGTNCAGTGGCNTATGA         |
| <b>CPV1</b> (6964-6985) | .t.....t..              | <b>CPV1</b> (1877-1904) | .....c...t.....aa...         | <b>CPV1</b> (1737-1757) | .....                       |
| <b>CPV2</b> (6332-6353) | .c.....a.....           | <b>CPV2</b> (1889-1916) | ..a....gtc..g....c...aa.ca   | <b>CPV2</b> (1749-1769) | .....                       |
| <b>CPV3</b> (5884-5905) | .g.....a.....t..        | <b>CPV3</b> (1886-1913) | .gtg...gtc.ag....c.gg...t..  | <b>CPV3</b> (1746-1766) | .....                       |
| <b>CPV4</b> (5922-5943) | .g.c.....a.....t..      | <b>CPV4</b> (1970-1997) | ...c....gtc.....c.....ga.... | <b>CPV4</b> (1830-1850) | .....                       |
| <b>CPV5</b> (6294-6315) | .g.....a.....t..        | <b>CPV5</b> (2289-2316) | tggt...gt..ag.....ga.g..     | <b>CPV5</b> (2149-2169) | .....                       |
| <b>CPV6</b> (6495-6516) | .....ctg.               | <b>CPV6</b> (1785-1812) | .....c...t.....a....         | <b>CPV6</b> (1645-1665) | .....a.....                 |
| <b>CPV7</b> (6162-6183) | .....a.....             | <b>CPV7</b> (1862-1889) | ..a....gtc.ag....c...aa.ca   | <b>CPV7</b> (1722-1742) | .....a.....                 |
| <b>FAP64</b>            | CCWATATCWVHCATNTCNCCATC | <b>PapF</b>             | ATGGCGGATAAAA-----AAGGTA     | <b>AR-E1R9</b>          | CATTWGTDGTDAYMAGSAKRGGVGGCA |
| <b>CPV1</b> (7434-7457) | .....                   | <b>CPV1</b> (816-835)   | .....c.g.. .....             | <b>CPV1</b> (2337-2365) | .....                       |
| <b>CPV2</b> (6790-6813) | ....c.....g.....        | <b>CPV2</b> (795-820)   | .....c..agg.ggtgaaag.....    | <b>CPV2</b> (2349-2377) | .....a.....ca.              |
| <b>CPV3</b> (6348-6371) | ....c.c.....            | <b>CPV3</b> (732-757)   | ...a..g.g.c.tagattc.....     | <b>CPV3</b> (2343-2371) | t...c.....g....t....a..     |
| <b>CPV4</b> (6377-6400) | .....                   | <b>CPV4</b> (813-838)   | ...a..g.g.cctgggagc.....     | <b>CPV4</b> (2427-2455) | t...gc...c....at.at....a..  |
| <b>CPV5</b> (6752-6775) | ....c...g.....          | <b>CPV5</b> (1132-1157) | ...ac.g.g.ctagattc.....      | <b>CPV5</b> (2746-2774) | tg.....at....a..            |
| <b>CPV6</b> (6968-6991) | .....                   | <b>CPV6</b> (706-725)   | .....                        | <b>CPV6</b> (2242-2270) | .....t.....t..a..           |
| <b>CPV7</b> (6620-6643) | ....c.....g.....        | <b>CPV7</b> (774-799)   | .....a..ag..ggtgaaag.....    | <b>CPV7</b> (2319-2347) | tg...a.....t..tag           |
| <b>canPVf</b>           | CTTCCTGAWCCTAAYMAKTTTGC | <b>PapR</b>             | AACAGCTGTTTTTTAGCTTTTTT      | <b>AR-L1F1</b>          | TTDCAGATGGCNGTNTGGCT        |
| <b>CPV1</b> (7068-7091) | ....a..c.....           | <b>CPV1</b> (1128-1151) | .....c.....a.c.....          | <b>CPV1</b> (6830-6851) | .....                       |
| <b>CPV2</b> (6427-6450) | ..c.c.....a.....        | <b>CPV2</b> (1137-1160) | ..a..tc..cgc..gctg.g...      | <b>CPV2</b> (6195-6216) | .....t....a.                |
| <b>CPV3</b> (5985-6008) | ..c.....                | <b>CPV3</b> (1054-1076) | c.a.ag.c.gcgc.ttgac.c.c.     | <b>CPV3</b> (5750-5771) | .....g.                     |
| <b>CPV4</b> (6023-6046) | ....c.....gc.....       | <b>CPV4</b> (1132-1154) | c.acaggcg.c.c.ttg.c.g...     | <b>CPV4</b> (5788-5809) | .....g.                     |
| <b>CPV5</b> (6395-6418) | ..c....c..a...a.....    | <b>CPV5</b> (1451-1473) | c.ataacc.gcgc.ttg.c.g...     | <b>CPV5</b> (6160-6181) | .....g.                     |
| <b>CPV6</b> (6599-6622) | t.g....c.....           | <b>CPV6</b> (1015-1038) | .....c....t..c.....          | <b>CPV6</b> (6361-6382) | .....                       |
| <b>CPV7</b> (6257-6280) | t.....c..a.....         | <b>CPV7</b> (1098-1121) | ..t..ac.ccgc..gctg.....      | <b>CPV7</b> (6025-6046) | .....t....a.                |
| <b>CP4</b>              | ATGGTACARTGGGCATWTGA    | <b>AR-E1F1</b>          | CAGGGVMWTTCCCTGBARYTGTTYC    | <b>AR-L1R3</b>          | CATRTCHCCATCYTCWAT          |
| <b>CPV1</b> (1737-1757) | .....t.....t.....       | <b>CPV1</b> (969-994)   | .....                        | <b>CPV1</b> (7428-7446) | .....                       |
| <b>CPV2</b> (1749-1769) | .....g.....t.....       | <b>CPV2</b> (978-1003)  | ..t.a.ggacatgca.gtg....aa    | <b>CPV2</b> (6784-6802) | ...c.g.....                 |
| <b>CPV3</b> (1746-1766) | .....c.....g.....       | <b>CPV3</b> (900-925)   | .....aa.ct..a..g.            | <b>CPV3</b> (6342-6360) | .....g...                   |
| <b>CPV4</b> (1830-1850) | .....g.....c.....       | <b>CPV4</b> (978-1003)  | .....g.....a..g.             | <b>CPV4</b> (6371-6389) | .....g...                   |
| <b>CPV5</b> (2149-2169) | .....g.....             | <b>CPV5</b> (1297-1322) | .....aa.ct..a..g.            | <b>CPV5</b> (6746-6764) | .....g...                   |
| <b>CPV6</b> (1645-1665) | .....t.....             | <b>CPV6</b> (856-881)   | .....a.....                  | <b>CPV6</b> (6962-6980) | .....g...                   |
| <b>CPV7</b> (1722-1742) | .....t.....             | <b>CPV7</b> (939-964)   | ..t.a.g.gcatgca.g...a..aa    | <b>CPV7</b> (6614-6632) | ...c.g.....                 |
| <b>CP5</b>              | GAGGYTGCAACCAAAAMTGRCT  | <b>AR-E1R2</b>          | TCATANGCCCACTGNACCAT         |                         |                             |
| <b>CPV1</b> (2178-2200) | .....g.....             | <b>CPV1</b> (1737-1757) | .....                        |                         |                             |
| <b>CPV2</b> (2190-2212) | .g.gct..g.....g.....    | <b>CPV2</b> (1749-1769) | .....                        |                         |                             |
| <b>CPV3</b> (2184-2206) | .t.....g..g.....        | <b>CPV3</b> (1746-1766) | .....                        |                         |                             |
| <b>CPV4</b> (2268-2290) | .t...att.g..g.....      | <b>CPV4</b> (1830-1850) | .....                        |                         |                             |
| <b>CPV5</b> (2587-2609) | at.....g.....t.....     | <b>CPV5</b> (2149-2169) | .....                        |                         |                             |
| <b>CPV6</b> (2083-2105) | a.....t.....            | <b>CPV6</b> (1645-1665) | .....t.....                  |                         |                             |
| <b>CPV7</b> (2160-2182) | ....actt.g.....         | <b>CPV7</b> (1722-1742) | .....t.....                  |                         |                             |

**Figure S2:** Multiple sequence alignments of primers and their binding sites. Oligo sequences are written from 5' to 3' in upper case letters according the IUPAC code. Genomic positions of the binding sites are put in brackets. Positions matching to the oligo sequences are shown as dots, positions not matching to the oligo sequences are shown as lower case letters.
